# Supplementary material for: Testing the validity of regional detail in global analyses of Sea surface temperature – the case of Chinese coastal waters
Source: Copernicus journal article supplement (doi:10.5194/os-2018-137), 2018-12-10
Supplement: Supplementary file [file os-2018-137-AC2-supplement.pdf]

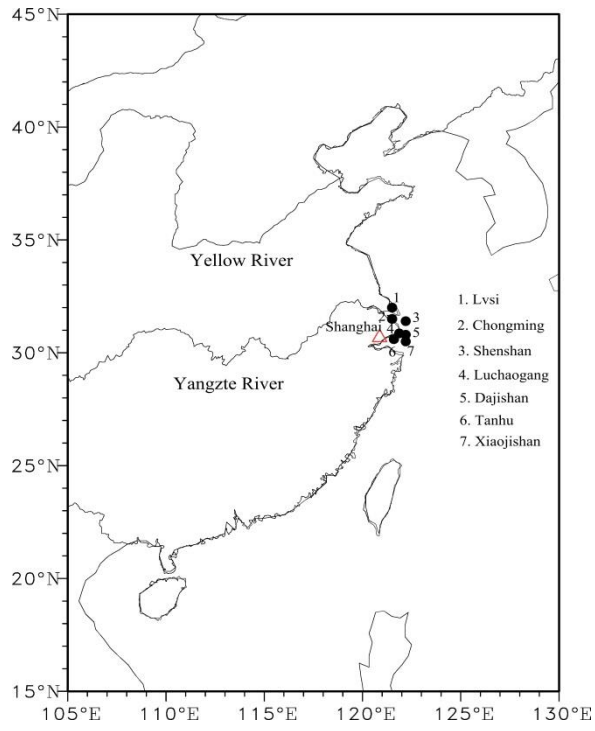

Figure 1. 7 hydrological stations around Shanghai
